# Supplementary material for: Ethylene Differentially Modulates Hypoxia Responses and Tolerance across Solanum Species
Source: Plants (Basel). 2020 Aug 13;9(8):1022. doi: 10.3390/plants9081022 (PMC7465973; doi:10.3390/plants9081022)
Supplement: Supplementary file 1 [file plants-09-01022-s001.xlsx]

## Sheet: Primers
Table S1 RT-qPCR primers used in this study
Potato (Solanum tuberosum)
Arabidopsis gene	Orthologue Identifier	Primer name	Oligo sequence 5’→3’
ETR2	PGSC0003DMP400028451	ST_ETR2_FW	CCTCATTCCAAATCGTCCTT
		ST_ETR2_Rv	CTGCAGGCATCTTCCAGTAA
PGB1	PGSC0003DMP400053876	ST_PGB1_FW	CAGACAAGGATGCTGCTGAT
		ST_PGB1_Rv	TCCTTGGGTCACGTATTTCA
RAP2.12	PGSC0003DMP400008715	ST_RAP2.12_FW	CAGACAAGGATGCTGCTGAT
		ST_RAP2.12_Rv	TCCTTGGGTCACGTATTTCA
PDC1	PGSC0003DMP400011112	ST_PDC1_FW	ACGGAGAAGGAAAATGTTGG
		ST_PDC1_Rv	GCTGCTGAGACCCTAGAACC
ACT11	PGSC0003DMP400048248	ST_ACT_FW	TCTTCGTTTGGATCTTGCTG
		ST_ACT_Rv	AGCCACATAGGCAAGCTTTT
Bittersweet (Solanum dulcamara)
Arabidopsis gene	Orthologue Identifier	Primer name	Oligo sequence 5’→3’
ACO2	Comp282_c0_seq1	SD_ACO2_Fw	CCTGTGCTCCACACTCTTG
		SD_ACO2_Rv	CCACTCCATTGTCATCAACC
ETR2	Comp3746_c0_seq1	SD_ETR2_FW	GGGCTTCCAAATAGCACAAT
		SD_ETR2_Rv	GCTGCTCAAAATCAAGGTGA
PGB1	Comp917_c0_seq1	SD_PGB1_Fw	CCACAACCTTTCCAGCTTTT
		SD_PGB1_Rv	ATGGGAGTCCATGAAGAAGG
PGB2	Comp15339_c0_seq2	SD_PGB2_Fw	ATCCGTTCATCTCCAGAAAG
		SD_PGB2_Rv	TGCTTCTTCCACTGTTCTCA
PGB3	Comp5816_c0_seq1	SD_PGB3_Fw	CAAAGAAGATGCCATTAGGAA
		SD_PGB3_Rv	CAGCCTTATGAGTGACTGGA
RAP2.3	Comp414_c0_seq1	SD_RAP2.3_Fw	CTCCGTCGATAAGCCTAAGA
		SD_RAP2.3_Rv	CCATGGTCTCTGCCTTATTC
RAP2.12	Comp428_c0_seq2	SD_RAP2.12_Fw	ATACGTGACCCAAGGAAAGG
		SD_RAP2.12_Rv	TTCTTGCCTCTGATCCTCCT
SRO5	Comp12109_c0_seq1	SD_SRO5_Fw	TCATAAGGGGAGGAAAATCA
		SD_SRO5_Rv	GTTTCCAGTTGATCCTTTGC
ADH1	Comp229_c0_seq1	SD_ADH1_Fw	AATGTGTCCATGATGGTTGG
		SD_ADH1_Rv	GGCCACTACAGATGGAAGGT
PDC1	Comp_353_c0_seq1	SD_PDC1_Fw	TTTCAACGACGTAGAGATCG
		SD_PDC1_Rv	GCCCGATTTTAGTCAAGAAC
TIP41 (AT4G34270.1)	Comp10185_c0_seq2	SD_TIP41_Fw	ATAACAATGGGAAGCCTGTC
		SD_TIP41_Rv	GCTGGAGAGAAACCACATTT
TUB6 (AT5G12250.1)	Comp321_c0_seq1	SD_TUB6_Fw	GATCAGCAAAGTTCCCATTC
		SD_TUB6_Rv	GGAGGCTGAGAATTGTGACT
Tomato (Solanum lycopersicum)
Arabidopsis gene	Orthologue Identifier	Primer name	Oligo sequence 5’→3’
ACO2	Solyc07g049550.3.1	SL_ACO2_Fw	TACCCGATCTTGACGAAGAA
		SL_ACO2_Rv	AAATTGGGACCTTTTGATCC
ETR2	Solyc06g053710.2.1	SL_ETR2_FW	CCTCATTCCAAATCGTCCTT
		SL_ETR2_Rv	TGAAGCTCATCAGCGATACC
RAP2.3	Solyc01g065980.2.1	SL_RAP2.3_Fw	ATAAATCAGATTCCGGCAAA
		SL_RAP2.3_Rv	CATGGCCTCTGTCTTATTCC
RAP2.12	Solyc06g063070.3.1	SL_RAP2.12_Fw	TCAAAGCCCTTGAGGTCTAA
		SL_RAP2.12_Rv	GTCAGCTTCGCAGTTTGAAT
PGB1	Solyc07g008240.3.1	SL_PGB1_Fw	TGTGCCATTGGATCAAAATC
		SL_PGB1_Rv	AGAGTGGAATCCCTCACCAC
PGB2	Solyc03g071690.4.1	SL_PGB2_Fw	CTGGAGATAGCACCAGTAGCA
		SL_PGB2_Rv	TTTCTCGAAGCTGAATTGCT
PGB3	Solyc08g068090.3.1	SL_PGB3_Fw	AGGAAGAGTGGTTTCGATCA
		SL_PGB3_Rv	GCGTCCAATCAATGCTGTAT
SRO5	Solyc03g114360.4.1	SL_SRO5_Fw	TGATTCAGCAAGTGAGGAAA
		SL_SRO5_Rv	ATTCTCCCTGGCTTATGTCC
ADH1	Solyc04g064710.3.1	SL_ADH1_Fw	ACACCTTTGTTTCCTCGAAT
		SL_ADH1_Rv	CGGTAAACACAGGAAGAACA
PDC1	Solyc10g076510.2.1	SL_PDC1_Fw	CGTGAACCTGTTCCATTTTT
		SL_PDC1_Rv	CCACAATGACTGGTTTCACA
TIP41 (AT4G34270.1)	Solyc10g049850.3.1	SL_TIP41_Fw	CAGTGGGAGGATTGTAAGGA
		SL_TIP41_Rv	AGATCCCATTATCTGCCAGT
TUB6 (AT5G12250.1)	Solyc10g086760.2.1	SL_TUB6_Fw	TGTTGTTCGTAAGGAAGCTG
		SL_TUB6_Rv	AAAAGCGTACCCATACCAGA
